# Supplementary material for: Efficient one-pot green synthesis of tetrakis(acetonitrile)copper(i) complex in aqueous media
Source: Royal Society of Chemistry journal article supplement (doi:10.1039/c8ra10564b), 2019-01-01
Supplement: c8ra10564b1.pdf [file c8ra10564b1.pdf]

## Supporting Information

### Efficient one-pot green synthesis of tetrakis(acetonitrile)copper(I) complex in aqueous media.

Ilya S. Kritchenkov,<sup>a</sup> Julia R. Shakirova<sup>a</sup> and Sergey P. Tunik<sup>\*a</sup>

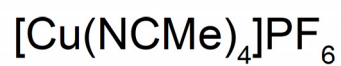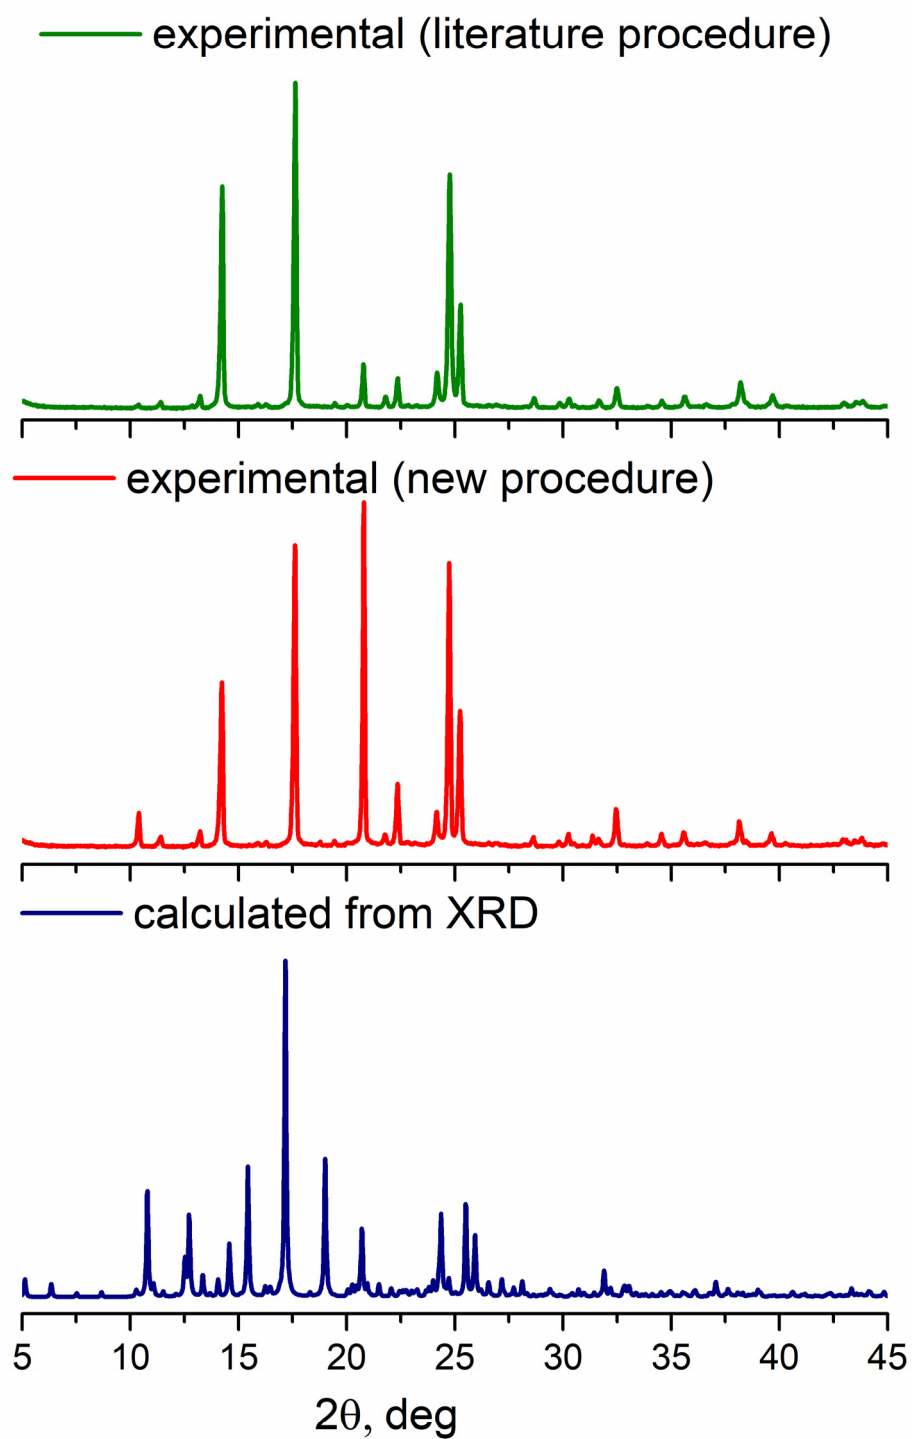

Figure S1. Powder X-ray diffraction patterns of [Cu(CH<sub>3</sub>CN)<sub>4</sub>][PF<sub>6</sub>]: experimental for complex, synthesized according to literature procedure (green), new procedure (red) and calculated from the single-crystal data CCDC 815342 (blue).

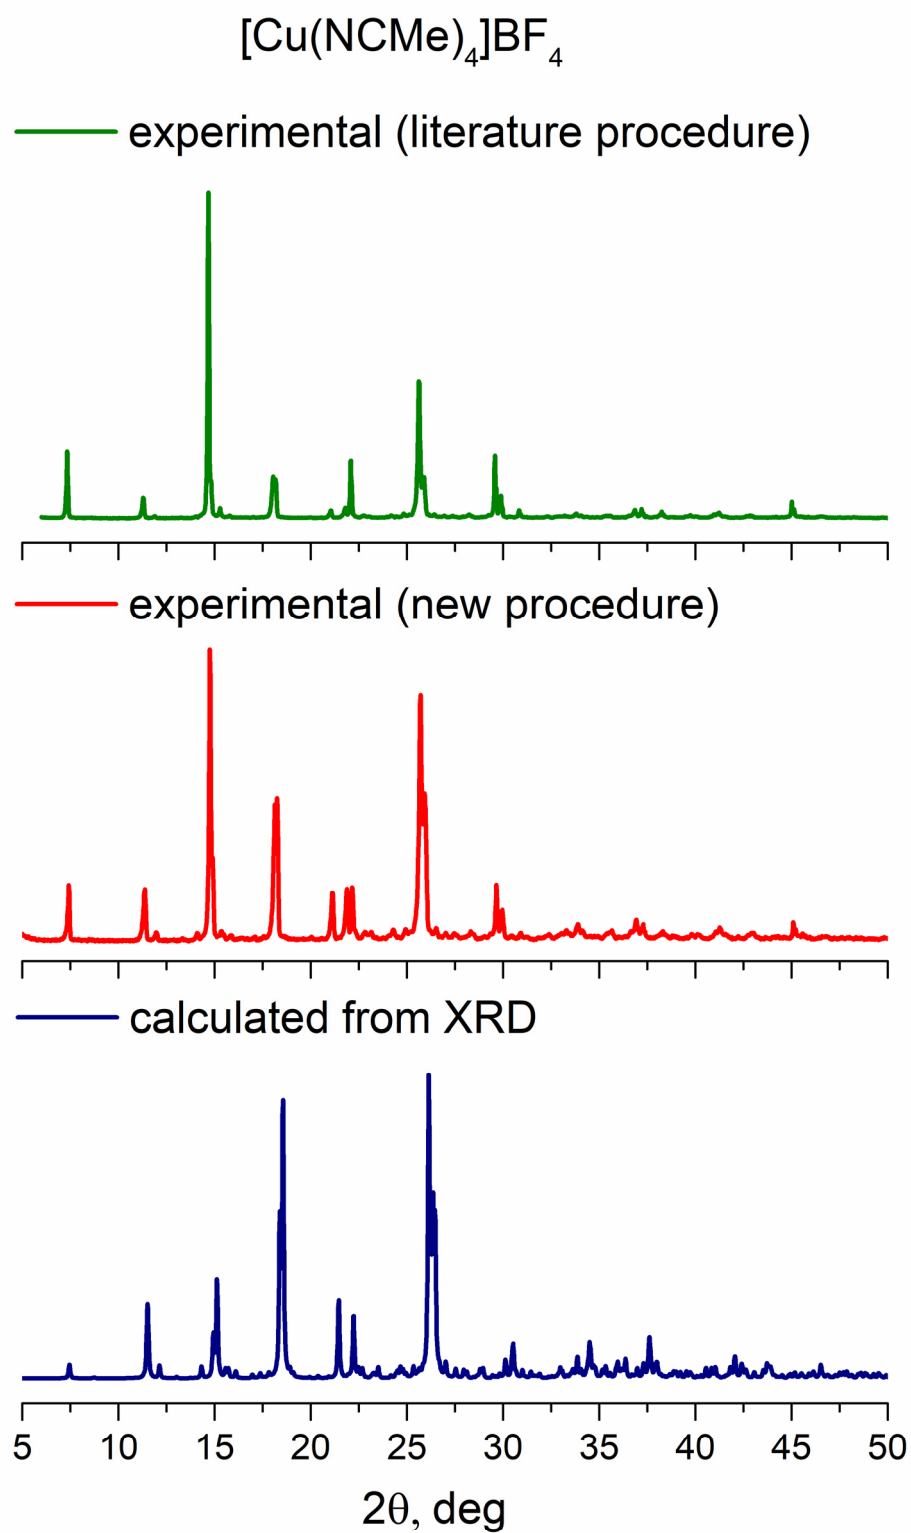

Figure S2. Powder X-ray diffraction patterns of  $[\text{Cu}(\text{CH}_3\text{CN})_4][\text{BF}_4]$ : experimental for complex, synthesized according to literature procedure (green), new procedure (red) and calculated from the single-crystal data CCDC 929493 (blue).

$^1\text{H}$ , BF = 400.13 MHz, Solvent - Acetone, T=298 K

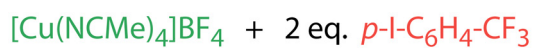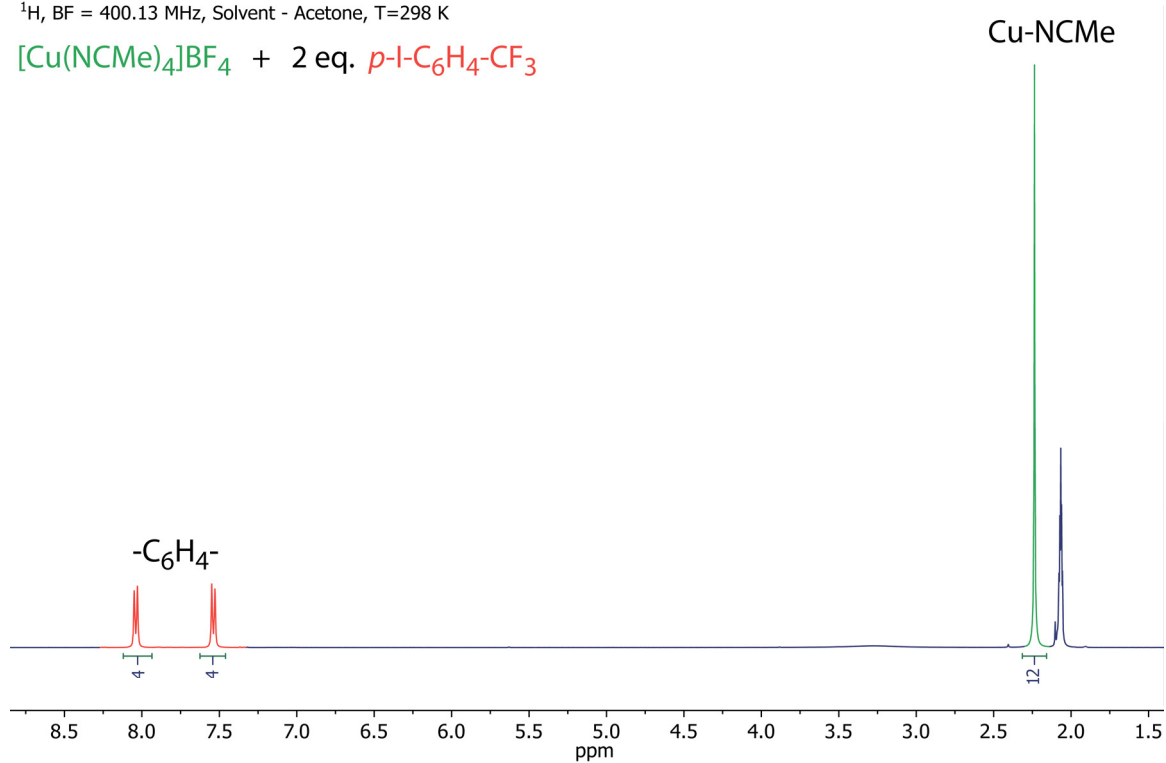

Figure S3.  $^1\text{H}$  NMR spectrum of  $[\text{Cu}(\text{CH}_3\text{CN})_4][\text{BF}_4]$  in presence of 2 equivalents of 4-iodobenzotrifluoride

$^1\text{H}$ , BF = 400.13 MHz, Solvent - Acetone, T=298 K

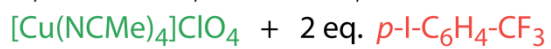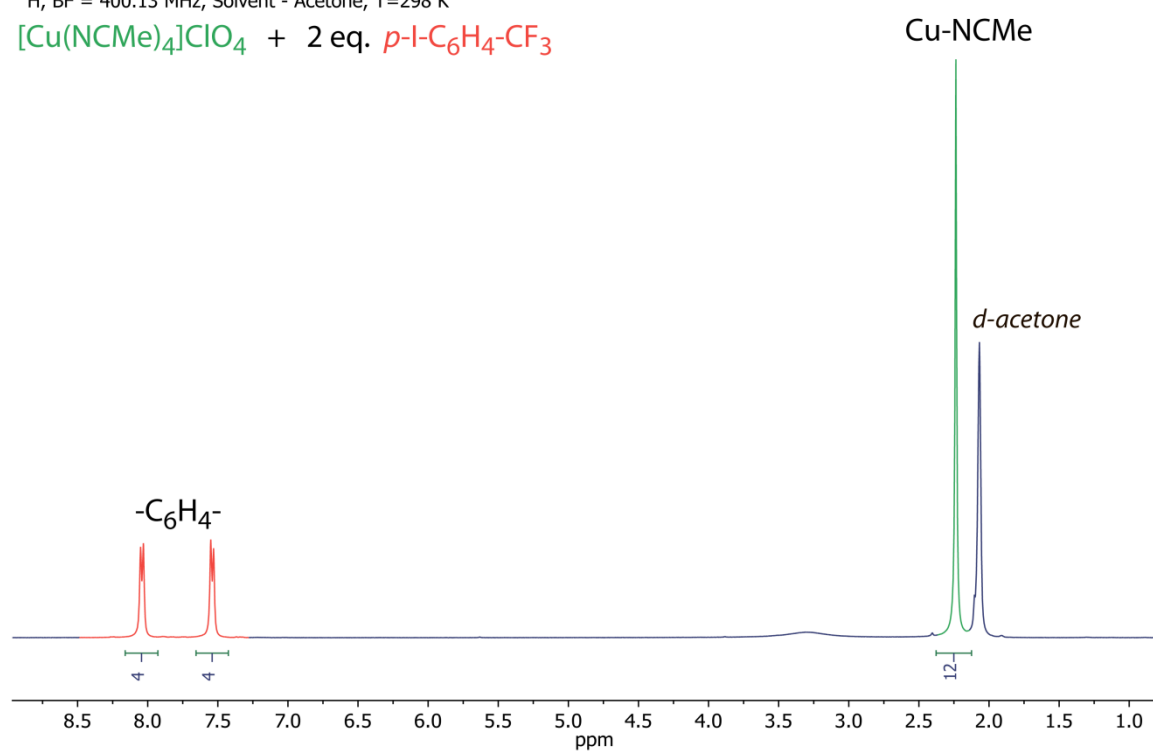

Figure S4.  $^1\text{H}$  NMR spectrum of  $[\text{Cu}(\text{CH}_3\text{CN})_4][\text{ClO}_4]$  in presence of 2 equivalents of 4-iodobenzotrifluoride

$^{19}\text{F}$ , BF = 376.498366 MHz, Solvent - Acetone, T=298 K

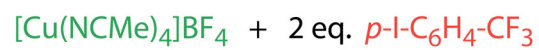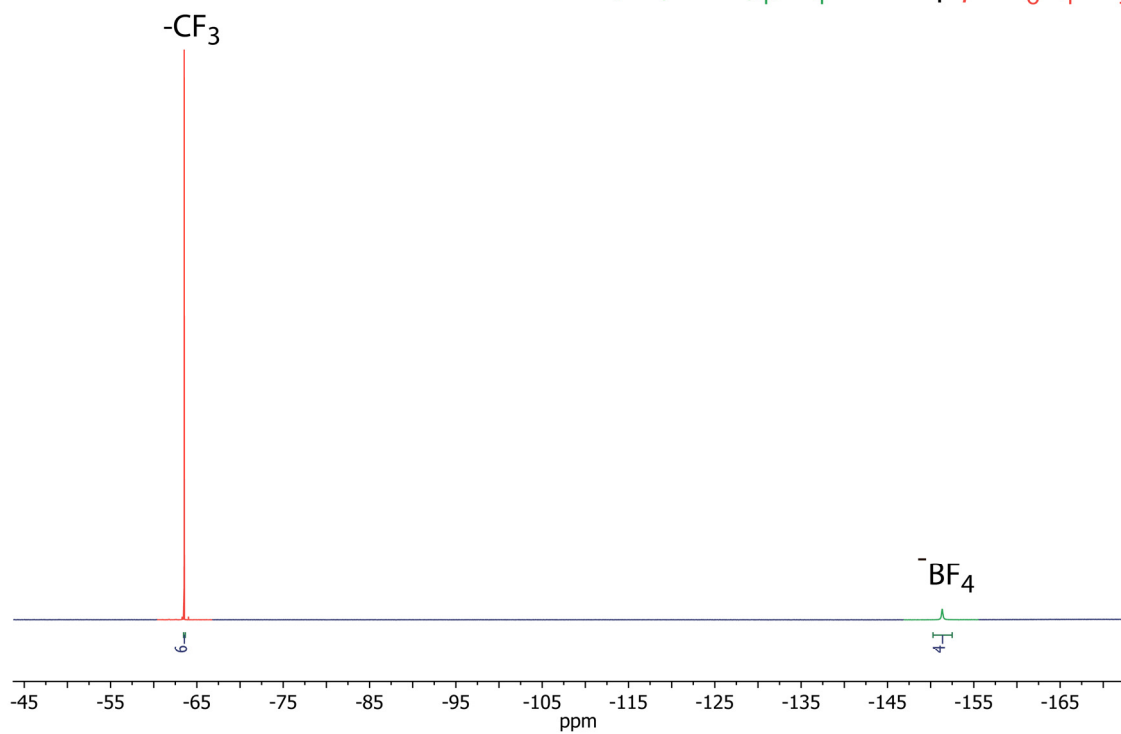

Figure S5.  $^{19}\text{F}$  NMR spectrum of  $[\text{Cu}(\text{CH}_3\text{CN})_4][\text{BF}_4]$  in presence of 2 equivalents of 4-iodobenzotrifluoride.
